# Supplementary material
Source: PubMed Central journal article supplement (PMC8440175)
Supplement: 41380_2020_671_MOESM14_ESM.pdf [file 41380_2020_671_MOESM14_ESM.pdf]

## Supplementary Figure Legends

### Supplementary Figure 1. Assessment of microglial depletion and repopulation effect on behavioral phenotypes in MIA offspring.

**a**, Average time per grooming bout.  $n = (23/9, 24/9, 19/11, 28/7)$  male mice/litters for (Saline+CTRL, MIA+CTRL, Saline+MG-REP, MIA+MG-REP). ns denotes no significance; determined by 2-way ANOVA ( $\alpha = 0.05$ ).

**b-c**, Time spent in the center of the three-chamber apparatus for social interaction tests (**b**); Total distance travelled in the three-chamber apparatus (**c**). No difference was observed between the saline or MIA  $\pm$ MG-REP groups.  $n = (15/5, 15/9, 12/5, 15/4)$  male mice /litters for (Saline+CTRL, Saline+MG-REP, MIA+CTRL, MIA+MG-REP). ns denotes no significance; determined by 2-way ANOVA ( $\alpha = 0.05$ ). Graphs indicate mean  $\pm$  s.e.m.

**d**, Communication deficits in male-female interactions was not observed in MIA mice in adulthood based on the number of ultrasonic vocalizations (USV) produced by male adult mice in presence of female mouse over 3 minutes.  $n = (19/6, 12/4, 20/5, 22/5)$  male mice/litters for (P60 Saline+CTRL, MIA+CTRL, Saline+MG-REP and MIA+MG-REP). Graphs show mean  $\pm$  s.e.m.

### Supplementary Figure 2. Microglia transcriptome analysis of genes altered across development and validation of gene expression of protrusion/neuritogenic molecules in murine microglia.

**a**, Principal component analysis (PCA) of RNA-seq profiles of acutely isolated microglia from E17 Saline (Sal), E17 MIA, P7 Sal, P7 MIA, P20 Sal, P20 MIA, P60 Sal+CTRL, P60 MIA+CTRL, P60 Sal+MG-REP and P60 MIA+MG-REP ( $n = 3$  per group, 10 groups in total)

**b**, Representative M0 and DAM/MGnD genes differentially expressed in 5 microglial modules and expression levels of *P2ry12* and *Cstb* in different time points. \* and \*\* denote  $p < 0.05$  and  $0.01$  as determined by two-way ANOVA and Tukey's *posthoc*.

**c**, Representative images of BrdU (red), EdU (cyan), and IBA1 (green) microglia for Saline+CTRL (top), MIA+CTRL (bottom), Saline+MG-REP (top) and MIA+MG-REP (bottom). Arrow shows BrdU<sup>+</sup>IBA1<sup>+</sup> original microglia. Arrowhead shows EdU<sup>+</sup>IBA1<sup>+</sup> repopulated microglia. Scale Bar = 20  $\mu\text{m}$ .

**Supplementary Figure 3. Volcano plot analysis of differentially expressed genes in microglia across development and validation of gene expression of protrusion/neuritogenic molecules in microglia by *in situ* hybridization.**

**a**, Venn diagram and volcano plots of significantly differentially expressed genes (DEG) in MIA versus Saline microglia at each age. Venn diagram shows number of genes with  $p < 0.05$  between MIA and Saline microglia by exact t-test. Volcano plots: significantly differentially expressed genes between MIA+CTRL and Saline+CTRL. Red text: genes upregulated; blue text: genes downregulated by MIA. X-axis: log<sub>2</sub> fold change in MIA+CTRL versus Saline+CTRL microglia, Y-axis: inverse log (p-value). Grey dots denote genes with  $p \geq 0.05$ .

The 14 common genes between E17 and P7 elements include *Scara5*, a ferritin receptor that mediate non-transferrin-dependent delivery of iron. Since iron accumulation is reported in activated microglia, this suggests *Scara5* mediates iron accumulation in E17 and P7 microglia. *Irf9* mediates type I interferon signaling, which may represent sustained poly(I:C)-induced antiviral response in microglia during these periods. The 19 common genes between E17 and P20 include zinc finger transcriptional factors (*Zfp398*, *Zfp467*), iron transport (*Slc11a2*),

multiple drug and metal transport (*Slc47a1*), synaptic molecules (*Sv2c*, *Shisa6*) and exocytosis (*Clec3b*). This suggest active transport of iron and metals, exocytosis, and modulation of synaptic activities.

The 10 common genes between E17 and P60 include chemokine and TGFB signaling (*Ccl2*, *Tgif1*), acute phase reaction (*Orm3*, *Lpar2*), and inhibition of sodium-coupled chloride cotransporter (*Wnk2*). The only common gene among E17, P7 and P60 is *Ankrd53*, which is related to mitosis. There are 4 common genes between P7 and P20 and 3 common genes between P7 and P60. The numbers were too few to annotate significant cluster or functions. The 10 common genes between P20 and P60 include transcription factors (*Egr2*, *Prox2*, *Prrx2*), mTORC2 pathway (*Prr5*), cell surface sialoprotein (*Spn*), mitosis (*Ptp4a1*) and novel transmembrane proteins (*Tspan4*, *Tmem132a*). Further studies are necessary to understand the functional role of these molecules in microglia.

**b**, Representative images of the confocal microscopic images of the *in situ* hybridization (ISH) and immunofluorescence of E17.5 microglia. Pregnant mice were ip injected with saline or poly(I:C) at E9.5 and the embryos were perfused, frozen sectioned, and subjected to ISH at E17.5. ISH was performed for detection of mRNA of *Ptn*, *Ntn*, *Ctnnd2*, *Ncam2*, *Wnt5a*, and scramble control (red), followed by immunofluorescence of IBA1 (green). The sections were subjected to confocal microscopy imaging at 40x original magnification. Scale bar = 5  $\mu$ m.

**c**, Validation of gene expression of neuritogenic molecules in murine microglia. Assessment of neuritogenic molecules in FACS-purified microglia from E17. Saline+CTRL and MIA+CTRL offspring. FCRLS<sup>+</sup> LY6C<sup>-</sup> microglial population (Q1) were 99.5% in Saline+CTRL group and 99.3% in MIA+CTRL group of gated CD11b<sup>+</sup> cells. The changes in neuritogenic gene expression (*Ptn*, *Ntn*, *Ctnnd2*, *Ncam2* and *Wnt5a*) in E17 microglia were determined by qPCR

and shown as fold change in MIA+CTRL over Saline+CTRL group. N = 5 litters per group (total 25 pups for Saline+CTRL and 27 pups for MIA+CTRL groups). \* $p < 0.05$  as determined by unpaired Student *t*-test. Graphs indicate mean  $\pm$  s.e.m.

**d**, Enhanced microglial interaction with synapses in layer V mPFC neuropil by laser-scanning confocal microscopic analysis. Confocal images of presynaptic VGLUT2 (red), postsynaptic PSD95 (green) and microglial IBA1+P2RY12 (white in left and middle panels, blue in right panels) in the layer V neuropil of mPFC in Saline (top panels) and MIA mice (bottom panels). Microglia, IBA1+P2RY12, in maximum projection of a z-stack ( $z = 1.5 \mu\text{m}$ ). Insets (right panels) show higher magnification of the images of synaptic interaction with microglia, white arrowheads show VGLUT2 or PSD95 co-localized with microglia (blue). 40 $\times$  objective magnification, Scale bars = 10  $\mu\text{m}$  (for insets: 1  $\mu\text{m}$ ).

**e-f**, MIA increases microglial contact with synapses, indicated by co-localization of VGLUT2 and PSD95 with IBA1+P2RY12<sup>+</sup> cells for Saline+CTRL and MIA+CTRL. **e**, Quantification of pre/post synaptic interaction with microglia (Number of PSD95<sup>+</sup> puncta, VGLUT2<sup>+</sup> puncta or PSD95<sup>+</sup>VGLUT2<sup>+</sup> synapses co-localized with microglia).  $n = 81/3/3$  microglia/ male mice / litters mice per group. **f**, Quantification of PSD95<sup>+</sup>, VGLUT2<sup>+</sup> and PSD95<sup>+</sup>VGLUT2<sup>+</sup> synaptic number analyzed.  $n = 3/3$  male mice/ litters mice per group. \* $p < 0.05$  and \*\* $p < 0.01$ , ns for no significance as determined by unpaired *t*-test.

**Supplementary Figure 4. Intrinsic property, spontaneous inhibitory postsynaptic current (sIPSC) and miniature excitatory postsynaptic current (mEPSC) of layer V RS cells and sIPSC and mEPSC of layer V IB cells.**

**a-l**, MIA has no effect on layer RS cells for **a-d**, their intrinsic properties, **e-h**, sEPSC and **i-l**, sIPSC except sIPSC decay, which is increased by MIA MG-REP group and Saline MG-REP group as compared to MIA CTRL group. **a-d**,  $n = (52/6/4, 45/6/4, 40/6/4, 33/7/6)$ , **e-l**,  $(15/3/1, 9/3/1, 8/3/1, 8/3/2)$  cells/ male mice/ litters, for Saline+CTRL, MIA+CTRL, Saline+MG-REP, MIA+MG-REP.

**m-p**, MIA has no effect on spontaneous inhibitory postsynaptic current (sIPSC) properties of IB cells such as sIPSC frequency (M), amplitude (N), rise time (O) and decay time (P),  $n = 8-10$  cells analyzed from 3 animals per group.

**q-t**, MIA increases miniature excitatory postsynaptic current (mEPSC) frequency (Q, MIA effect:  $p = 0.0228$ ) that is not corrected via repopulation, but has no effect on other mEPSC properties of IB cells including amplitude (R), rise time (S), or decay time (T).  $n = (6/2/2, 5/3/3, 15/5/4, 11/4/3)$  cells/ male mice/ litters for Saline+CTRL, MIA+CTRL, Saline+MG-REP, MIA+MG-REP.

**a-t**, 2-way ANOVA: MIA effect  $\#p < 0.05$ , Tukey's post-hoc: ns, no significance. Graphs indicate mean  $\pm$  s.e.m.

### **Supplementary Figure 5. Confocal laser scanning microscopic imaging and quantification of microglial interaction with synapses in Layer V mPFC of P60 mice.**

**a**, A representative image of a basal dendrite of a biocytin-filled Layer V pyramidal IB cells of P60 MIA+CTRL male mouse with multiple filopodia formation in basal dendrites (yellow asterisk). Scale bar = 7  $\mu$ m.

**b-e**, Analysis of microglial interaction with dendritic spines. Representative 40 $\times$  confocal images of microglia interaction with neurons: **b**, Basal dendrite of layer V pyramidal neuron (green) and

P2RY12/IBA1<sup>+</sup> microglia (red). White box denotes area shown in **b**. **c**, Complete 3D rotation of spine-microglia interaction for quantification, at 10-degree increments, **d**, Detail of spine-microglia interactions around the white box inset in **b**, shown in *xy*, *yz*, and *xz* maximum projection images. **e**, Individual *xy* plane optical slices, imaged at *z*-increments of 0.3  $\mu\text{m}$ . **f**, Formula for the calculation of distance between the microglia process and dendritic spine. The distance shorter than 1.5  $\mu\text{m}$  is defined as microglial interaction with dendritic spines. **g**, Diagram (top) of microglia-spine interaction types and representative confocal images (bottom) of microglial processes (red) interacting with the dendritic spines of biocytin-filled layer V IB cells (green). Arrowheads indicate distance between the two processes. **h-j**, Proximal (**h**), apposition (**i**) and encapsulating (**j**) spine-interactions normalized to basal dendrite length.  $n = (11/8/5/3, 11/8/5/4, 10/8/5/3, 10/4/3/3)$ , dendrites/cells/male mice/litters for (Saline+CTRL, MIA+CTRL, Saline+MG-REP, MIA+MG-REP). \* $p < 0.05$ , \*\* $p < 0.01$ , \*\*\* $p < 0.001$  and \*\*\*\* $p < 0.0001$ , ns denotes no significance; determined by 2-way ANOVA ( $\alpha = 0.05$ ) and Tukey's post-hoc. Graphs indicate mean  $\pm$  s.e.m. **k-l**, Confocal microscopic live imaging-assisted analysis of effect of MIA microglia on dendritic spine formation in murine primary cultured cortical neurons. **k**, GFP-labeled E16.5 primary cultured cortical murine neuron at DIV19 was co-cultured with FACS-purified E17.5 murine microglia from saline (Saline MG) or MIA offspring (MIA MG).  $n=6-7$  dendrites per group from pooled E17.5 embryos/litter. Representative images show increased filopodia in neuronal dendrites co-cultured with MIA microglia **l**, The total % of filopodia spines is increased when co-cultured with MIA MG.

**h-j** and **l**. \* $p < 0.05$ , \*\* $p < 0.01$ , \*\*\* $p < 0.001$  and \*\*\*\* $p < 0.0001$ , ns denotes no significance; determined by 2-way ANOVA ( $\alpha = 0.05$ ) and Tukey's post-hoc. Graphs indicate mean  $\pm$  s.e.m.

**m**, Scheme of microglia mediation of MIA-induced neural deficits underlying ASD-like behavior.

**1.** Poly(I:C) injection stimulates immune response in mother, altering cytokines in the maternal-fetal placental barrier. Cytokine and sensome signaling molecules infiltrate the placental barrier, leading to altered microglial developmental gene expression trajectory in the fetus

**2.** Altered microglial transcriptome leads to aberrant microglial distal process outgrowth. Increased branching is associated with enhanced microglia-spine interactions in layer V basal dendrites, resulting in increased neuronal spine density.

**3.** Altered morphology and interactions of spines with microglia leads to, or alternatively is a result of, aberrant neurophysiological activity (intrinsic and synaptic).

**4.** Abnormal neuronal activity results in altered PFC function, underlying altered repetitive and social behaviors.
